# Supplementary material for: Synthesis and characterization of high-purity SnO2(ZnO:Sn)m superlattice nanowire arrays with broad-spectrum emissions
Source: Royal Society of Chemistry journal article supplement (doi:10.1039/d0ce00889c), 2020-01-01
Supplement: d0ce00889c4.pdf [file d0ce00889c4.pdf]

Supporting Information

# **Synthesis and Characterization of High Purity $\text{SnO}_2(\text{ZnO}:\text{Sn})_m$ Superlattice Nanowire Arrays with Broad-spectrum Emission**

Jianing Tan<sup>a†</sup>, Song Jiang<sup>a†</sup>, Binghui Ge<sup>b,c</sup>, Bojia Xu<sup>a</sup>, Baobao Cao<sup>a\*</sup>

<sup>a</sup> Key Laboratory of Advanced Technologies of Materials, Ministry of Education, Southwest Jiaotong University, Chengdu, China

<sup>b</sup> Institute of Physical Science and Information Technology, Anhui University, Hefei, China.

<sup>c</sup> Beijing National Laboratory for Condensed Matter Physics, Institute of Physics, Chinese Academy of Science, Beijing, China

Keywords:  $\text{SnO}_2(\text{ZnO}:\text{Sn})_m$ ; superlattice; nanowires array; CVD; broad-spectrum emission

\*Address correspondence to: baobao-cao@hotmail.com

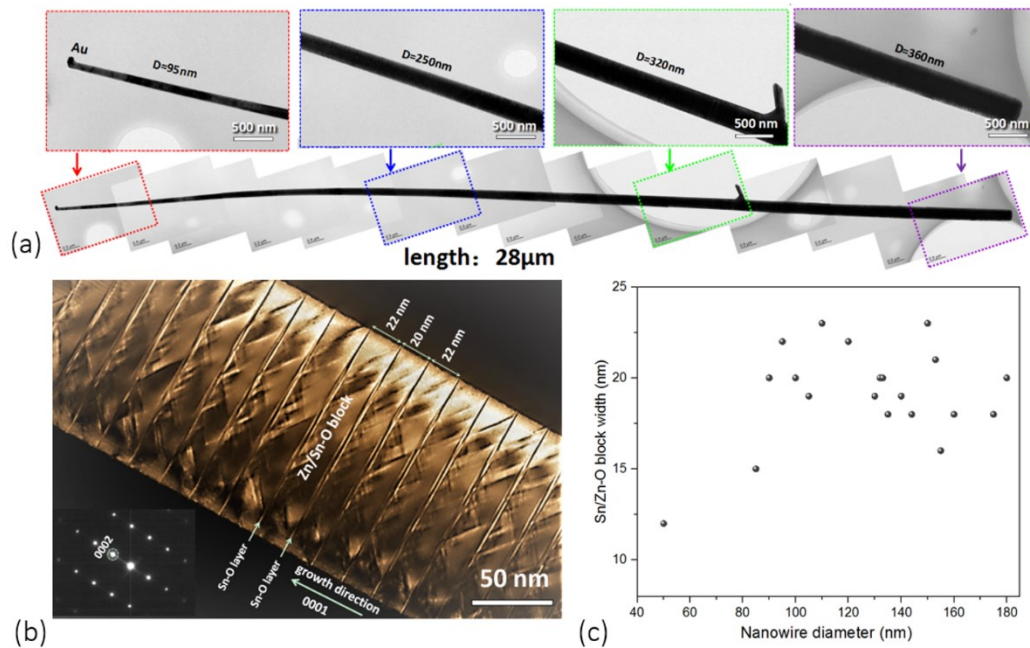

Fig. S1 (a) ultra-long  $\text{SnO}_2(\text{ZnO:Sn})_m$  nanowire with a tapered tip. (b) TEM image of part of the superlattice nanowire with periodicity around  $20\text{ nm}$ . (c)  $\text{Sn/Zn-O}$  block width distribution along the nanowire.

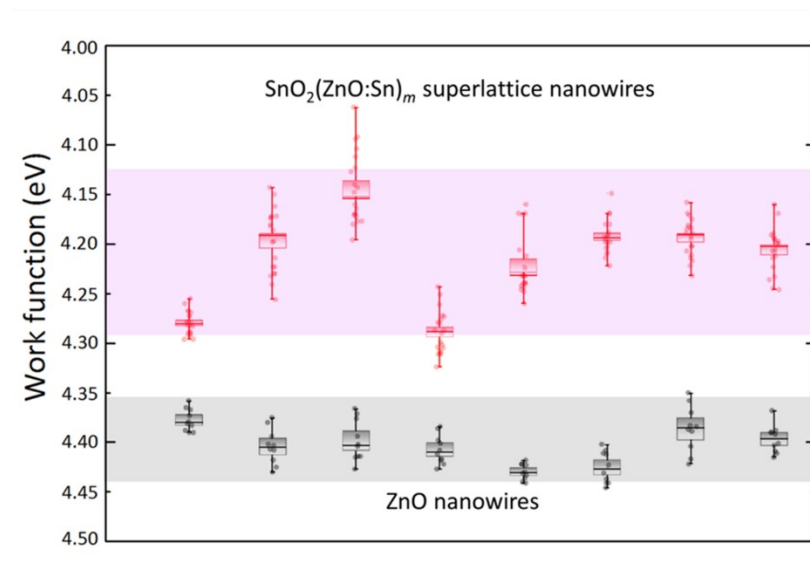

Fig. S2 Work function of  $\text{SnO}_2(\text{ZnO:Sn})_m$  and ZnO nanowires at different position.
