# Supplementary figures and images for: Synthesis and characterization of high-purity SnO2(ZnO:Sn)m superlattice nanowire arrays with broad-spectrum emissions
Source: Royal Society of Chemistry journal article supplement (doi:10.1039/d0ce00889c), 2020-01-01

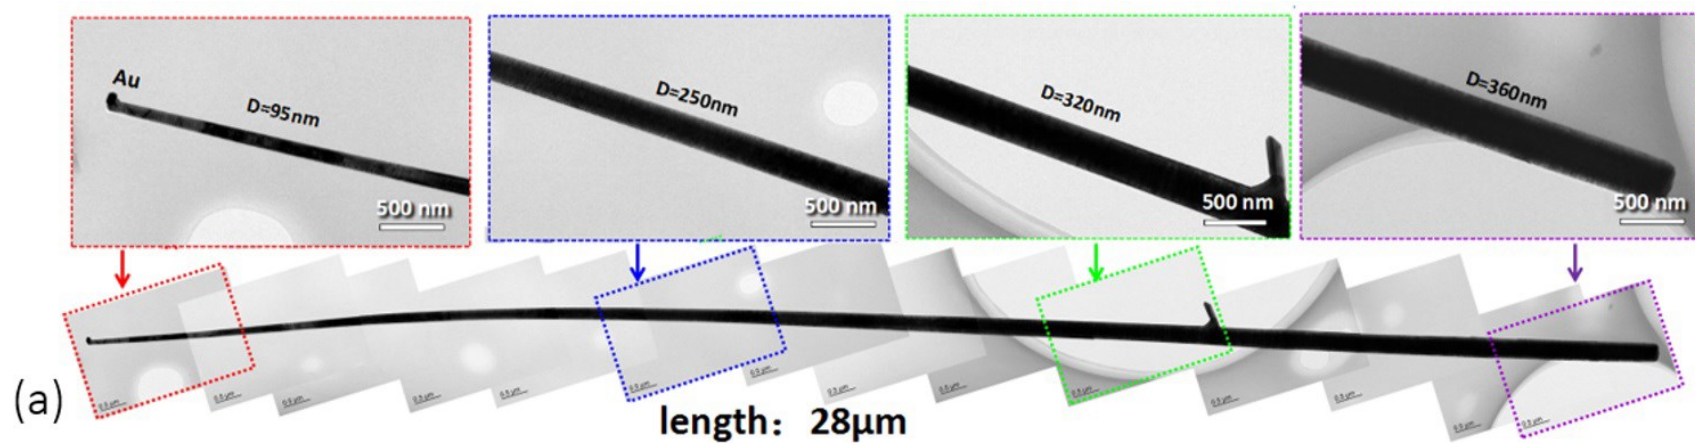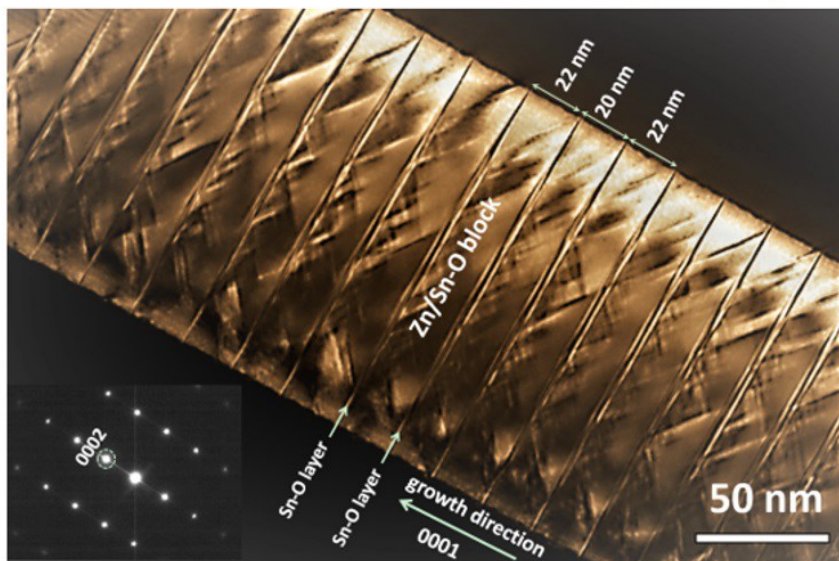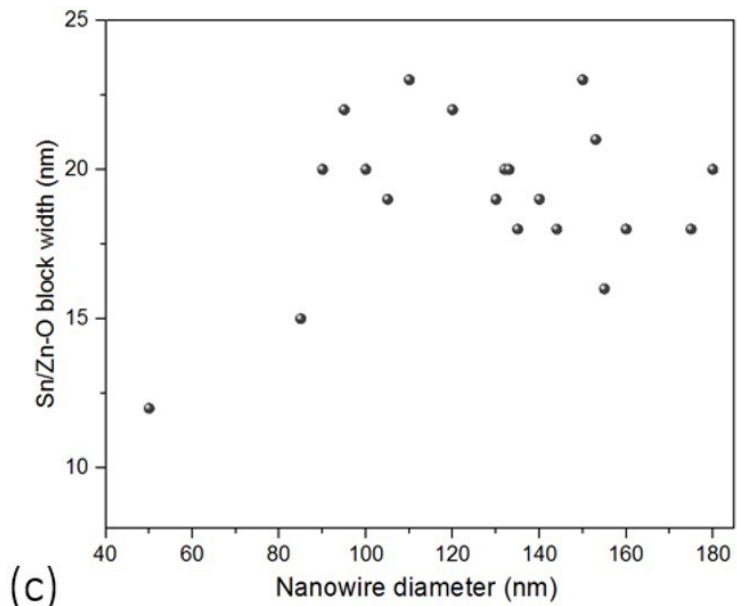

Supplement: d0ce00889c2.pdf [file d0ce00889c2.pdf]

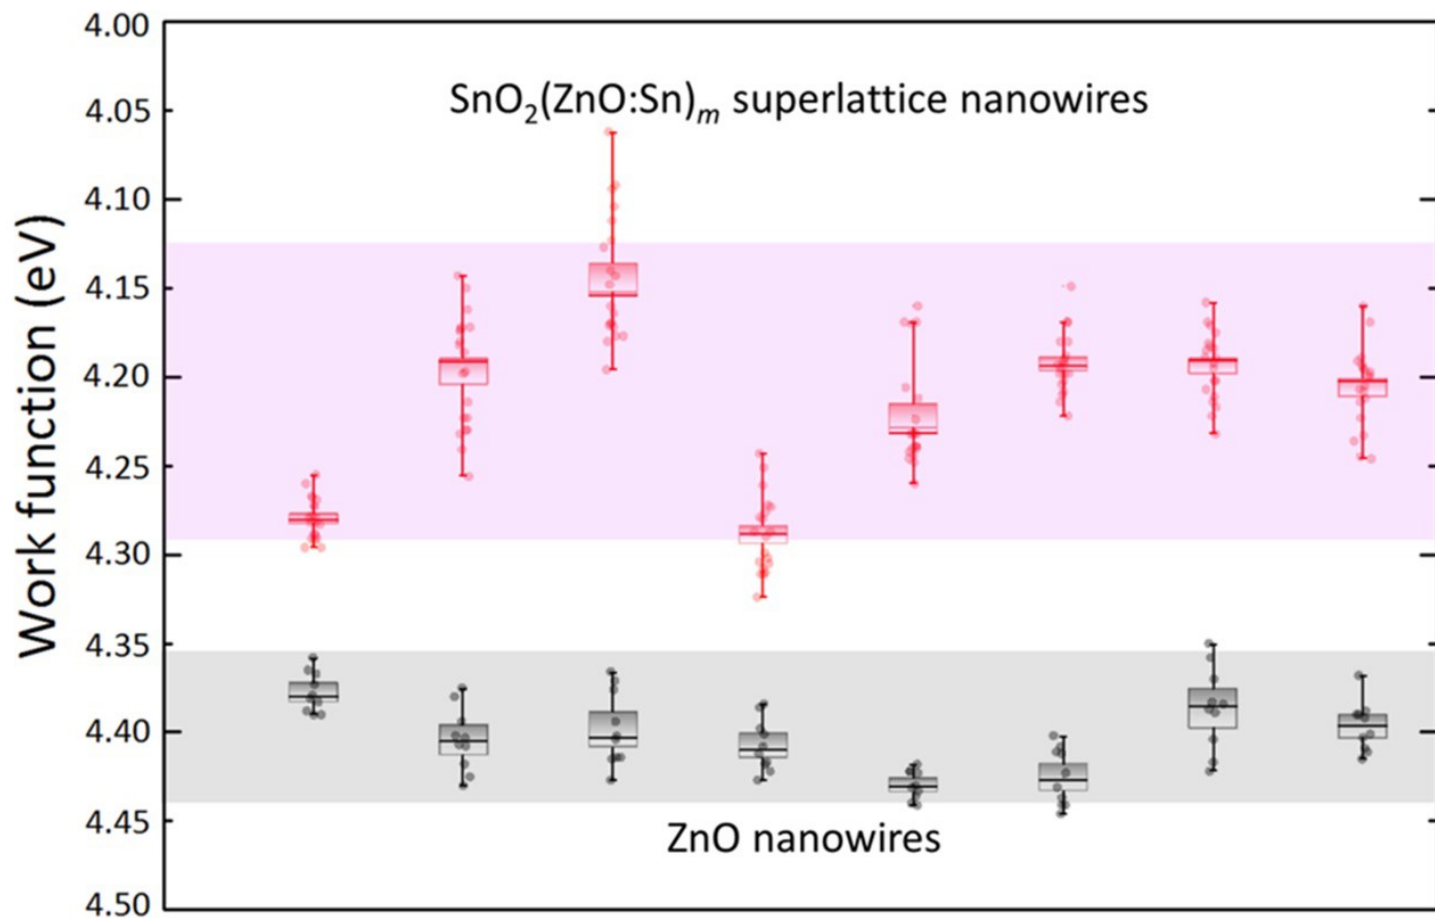

Supplement: d0ce00889c3.pdf [file d0ce00889c3.pdf]
